# Supplementary material
Source: publisher site journal article supplement (http://www.degruyter.com/publication/journal_key/HTMP/downloadAsset/HTMP_CFP%20FM2020.pdf)
Supplement: Supplementary file 1 [file HTMP_CFP%20FM2020.pdf]

## SPECIAL ISSUE ON FUTURE MATERIALS 2020

### GUEST EDITORS

---

**Leonard Deepak Francis**, International Iberian Nanotechnology Laboratory, Portugal

**Begoña Espiña**, International Iberian Nanotechnology Laboratory, Portugal

### DESCRIPTION

---

Committee Members invites participants from across the globe to join in this annual flagship conference on **Materials Science and Nanotechnology. Future Materials 2020** is comprised of various sessions designed to offer comprehensive symposiums that address current issues in the field of Materials Science and provides a fantastic opportunity to network with your peers from academia and industrialists which includes professors, researchers, Materials Scientists, Materials Engineers, and Students. The conference also provides an opportunity to meet Prof. Ada E. Yonath (Nobel Laureate 2009) and Prof. Michael Kosterlitz (Nobel Laureate 2016).

### HOW TO SUBMIT

---

The deadline for manuscript submission would be by **25th of March, 2020**.

For further details and submission process of the article please mail us at [rishi.k@materialseurope.com](mailto:rishi.k@materialseurope.com)
